# Supplementary material for: The association of age at menarche and adult height with mammographic density in the International Consortium of Mammographic Density
Source: PubMed Central journal article supplement (PMC9284807; doi:10.1186/s13058-022-01545-9), 2022-07-14
Supplement: 13058_2022_1545_MOESM1_ESM.pdf [file 13058_2022_1545_MOESM1_ESM.pdf]

**Supplementary Table S1: Correlation between height and BMI (weight/height<sup>2</sup>) and the power coefficient for the best fitting weight/height<sup>p</sup> relationship in each population group**

| Population Group     | No. of women | Correlation between height and BMI (kg/m <sup>2</sup> ) | Power coefficient (k <sub>2</sub> ) in unit of weight for height, i.e. weight/height <sup>k<sub>2</sub></sup> |
|----------------------|--------------|---------------------------------------------------------|---------------------------------------------------------------------------------------------------------------|
| UK-Eth-South Asian   | 135          | -0.35                                                   | 0.77                                                                                                          |
| Turkey               | 395          | -0.31                                                   | 0.62                                                                                                          |
| Malaysia-Indian      | 247          | -0.30                                                   | 0.82                                                                                                          |
| Korea                | 389          | -0.28                                                   | 1.14                                                                                                          |
| Australia-Italian    | 171          | -0.25                                                   | 0.96                                                                                                          |
| US-USC-Asian         | 51           | -0.22                                                   | 1.05                                                                                                          |
| UK-London-White      | 242          | -0.22                                                   | 0.92                                                                                                          |
| South Africa         | 371          | -0.21                                                   | 1.09                                                                                                          |
| UK-Eth Black         | 221          | -0.20                                                   | 1.17                                                                                                          |
| US-MEC-Japanese      | 239          | -0.20                                                   | 1.00                                                                                                          |
| Singapore-Indian     | 199          | -0.20                                                   | 1.19                                                                                                          |
| Hong Kong            | 204          | -0.19                                                   | 1.26                                                                                                          |
| Egypt                | 475          | -0.18                                                   | 1.12                                                                                                          |
| US-NHS-White         | 397          | -0.17                                                   | 1.06                                                                                                          |
| Israel-Arab          | 391          | -0.17                                                   | 1.18                                                                                                          |
| Japan                | 384          | -0.16                                                   | 1.35                                                                                                          |
| Spain                | 758          | -0.16                                                   | 1.28                                                                                                          |
| UK-Eth-White         | 247          | -0.15                                                   | 1.20                                                                                                          |
| UK-Age Trial-White   | 160          | -0.15                                                   | 1.30                                                                                                          |
| Israel-Jewish        | 387          | -0.14                                                   | 1.30                                                                                                          |
| Iran                 | 392          | -0.14                                                   | 1.42                                                                                                          |
| Netherlands          | 362          | -0.13                                                   | 1.48                                                                                                          |
| US-Mayo-White        | 397          | -0.13                                                   | 1.24                                                                                                          |
| US-USC-Black         | 112          | -0.13                                                   | 1.49                                                                                                          |
| Singapore-Malay      | 197          | -0.12                                                   | 1.53                                                                                                          |
| Australia-Greek      | 141          | -0.11                                                   | 1.53                                                                                                          |
| Poland               | 396          | -0.09                                                   | 1.54                                                                                                          |
| Canada               | 379          | -0.09                                                   | 1.53                                                                                                          |
| Singapore-Chinese    | 196          | -0.08                                                   | 1.62                                                                                                          |
| Australia-Australian | 393          | -0.08                                                   | 1.63                                                                                                          |
| US-USC-White         | 162          | -0.08                                                   | 1.54                                                                                                          |
| US-MEC-White         | 153          | -0.06                                                   | 1.58                                                                                                          |
| Norway               | 196          | -0.06                                                   | 1.78                                                                                                          |
| Malaysia-Chinese     | 396          | -0.05                                                   | 1.82                                                                                                          |
| Malaysia-Malay       | 217          | -0.05                                                   | 1.74                                                                                                          |
| Mexico               | 147          | -0.02                                                   | 1.87                                                                                                          |
| India                | 185          | 0.03                                                    | 2.17                                                                                                          |
| US-MEC-Hawaiian      | 142          | 0.03                                                    | 2.16                                                                                                          |
| Chile                | 187          | 0.09                                                    | 2.39                                                                                                          |

**Abbreviations: BMI: Body Mass Index; No.: number**

**Supplementary Table S2: Analyses using different methods to adjust (or not) for body fatness in the associations of menarche and height with percent density, dense area and breast area, with positive, null and inverse associations highlighted in green, blue and orange respectively**

| Outcome                               | Approach | Adjustment for body fatness |                      |                                       |
|---------------------------------------|----------|-----------------------------|----------------------|---------------------------------------|
|                                       |          | None                        | BMI                  | Excess weight for height <sup>a</sup> |
| <b>Menarche (per 1 year increase)</b> |          |                             |                      |                                       |
| PD                                    | Meta     | 0.05 (0.03, 0.07)           | 0.02 (0.01, 0.04)    | 0.02 (0.01, 0.04)                     |
| PD                                    | Pooled   | 0.06 (0.04, 0.08)           | 0.02 (0.01, 0.04)    | 0.02 (0.01, 0.04)                     |
| Dense area                            | Meta     | 0.04 (0.02, 0.06)           | 0.04 (0.02, 0.06)    | 0.04 (0.02, 0.06)                     |
| Dense area                            | Pooled   | 0.04 (0.02, 0.06)           | 0.03 (0.01, 0.04)    | 0.03 (0.01, 0.05)                     |
| Breast area                           | Meta     | -0.06 (-0.09, -0.03)        | 0.02 (0.00, 0.04)    | 0.02 (0.00, 0.04)                     |
| Breast area                           | Pooled   | -0.06 (-0.12, -0.06)        | 0.01 (-0.02, 0.03)   | 0.01 (-0.02, 0.03)                    |
| <b>Height (per 10 cm increase)</b>    |          |                             |                      |                                       |
| PD                                    | Meta     | 0.06 (0.01, 0.10)           | -0.04 (-0.08, 0.00)  | 0.08 (0.04, 0.12)                     |
| PD                                    | Pooled   | 0.05 (0.00, 0.09)           | -0.06 (-0.10, -0.02) | 0.07 (0.03, 0.11)                     |
| Dense area                            | Meta     | 0.08 (0.02, 0.13)           | 0.08 (0.02, 0.13)    | 0.08 (0.03, 0.13)                     |
| Dense area                            | Pooled   | 0.07 (0.01, 0.12)           | 0.06 (0.00, 0.11)    | 0.07 (0.01, 0.12)                     |
| Breast area                           | Meta     | 0.00 (-0.07, 0.07)          | 0.30 (0.25, 0.36)    | -0.04 (-0.09, 0.02)                   |
| Breast area                           | Pooled   | 0.01 (-0.07, 0.08)          | 0.32 (0.27, 0.38)    | -0.02 (-0.08, 0.04)                   |

**Abbreviations: BMI: Body Mass Index**

<sup>a</sup> Residuals generated from regressing log(weight) on log(height) for each population group separately.
